# Supplementary material for: Germanium/phosphorus cage compounds with germanium in three different oxidation states
Source: Royal Society of Chemistry journal article supplement (doi:10.1039/c1cc13937a), 2011-01-01
Supplement: c1cc13937a.pdf [file c1cc13937a.pdf]

# Electronic Supplementary Information for the paper entitled: Germanium/Phosphorus Cage Compounds with Germanium in Three Different Oxidation States

*Stefan Almstätter, Gábor Balázs, Michael Bodensteiner and Manfred Scheer\**

\* Prof. Dr. M. Scheer, Dr. S. Almstätter, Dr. G. Balázs, Dr. M. Bodensteiner  
Institut für Anorganische Chemie der Universität Regensburg,  
D-93040 Regensburg, Germany  
Fax: +49-941-943-4441  
E-mail: [manfred.scheer@chemie.uni-regensburg.de](mailto:manfred.scheer@chemie.uni-regensburg.de)

[\*\*] This work was supported by the Deutsche Forschungsgemeinschaft and the Fonds der Chemischen Industrie. The authors are grateful to the COST action CM0802 (PhoSciNet) for general support.

## Contents:

1. Experimental Section
2. Crystallographic Details
3. Computational Details

## 1. Experimental Section

All manipulations were performed under an atmosphere of dry argon using standard glovebox and Schlenck techniques. All solvents were freshly distilled from appropriate drying agents immediately prior to use. NMR spectra in solution were obtained on either a Bruker AMX 300 or Bruker Avance 400 spectrometer with  $\delta$  referenced to external  $\text{SiMe}_4$  ( $^1\text{H}$ ,  $^{13}\text{C}$ ) or  $\text{H}_3\text{PO}_4$  ( $^{31}\text{P}$ ). The solid-state  $^{31}\text{P}$  MAS NMR spectrum of compound **1** was recorded on a Bruker AVANCE300 solid-state spectrometer in a 2.5 mm probe. FD MS spectra were acquired on a Finnigan MAT 95 mass spectrometer.  $\text{SnCl}_2$  was obtained from Aldrich and used without further purification. The substances  $\text{GeCl}_2(\text{diox})$ <sup>1</sup> and  $t\text{BuPH}_2$ <sup>2</sup> were prepared

according to literature methods.

**Synthesis of [Ge<sub>7</sub>(*Pt*Bu)<sub>4</sub>Cl<sub>6</sub>] 1:** To a stirred solution of 0.3 ml *t*BuPH<sub>2</sub> (222 mg, 2.5 mmol) in THF (20 ml) at –20°C a *n*-butyllithium solution (1.54 mL, 1.6 M, 2.5 mmol) was added. The reaction mixture was warmed up to ambient temperature and stirred for another hour. After cooling to –70°C to this solution 1 g of solid GeCl<sub>2</sub>(diox) (4.3 mmol) was added. The solution was stirred for 16 hours at ambient temperature in which the color turned orange. The solvent was changed to toluene and the solution was filtered to remove LiCl. Storage at –25°C for three days results in yellow rods of **1**. Yield: 165 mg (25%)

**1: Element. Analysis:** C<sub>16</sub>H<sub>36</sub>P<sub>4</sub>Ge<sub>7</sub>Cl<sub>6</sub> (1079.4 g/mol): C 18.05 (calc. 17.90); H 3.68 (3.38)%. **MS** (EI, 70 eV): *m/z* (%) = 1074.9 (2.2) [M<sup>+</sup>]. **<sup>1</sup>H NMR** (400.13 MHz, C<sub>6</sub>D<sub>6</sub>, 25°C, TMS): δ = 1.1 (d, <sup>3</sup>*J*(P,H) = 16 Hz, 9 H), 1.5 ppm (d, <sup>3</sup>*J*(P,H) = 16 Hz, 27 H); **<sup>31</sup>P{<sup>1</sup>H} NMR** (161.98 MHz, C<sub>6</sub>D<sub>6</sub>, 25°C, H<sub>3</sub>PO<sub>4</sub> 85%): δ = 4 (q, <sup>2</sup>*J*(P,P) = 22 Hz, 1 P), 85 ppm (d, <sup>2</sup>*J*(P,P) = 22 Hz, 3 P); **<sup>31</sup>P NMR** (121.49 MHz, C<sub>6</sub>D<sub>6</sub>, 25°C, H<sub>3</sub>PO<sub>4</sub> 85%): δ = 4 (m), 85 ppm (m); **<sup>13</sup>C{<sup>1</sup>H} NMR** (100.62 MHz, C<sub>6</sub>D<sub>6</sub>, TMS): δ = 33.3 (s, C-quart.), 33.6 (s, C-quart.), 34.8 (s, CH<sub>3</sub>), 41.5 ppm (s, CH<sub>3</sub>).

**Synthesis of [Ge<sub>8</sub>(*Pt*Bu)<sub>4</sub>Br<sub>6</sub>] 2:** *n*BuLi (1.4 mL, 1.6 M, 2.2 mmol) was added to a solution of 0.26 ml *t*BuPH<sub>2</sub> (194 mg, 2.2 mmol) in THF at –20°C. After stirring for one hour at ambient temperature and cooling to –70°C 1 g of solid GeBr<sub>2</sub> (4.3 mmol) was added. The red reaction mixture was stirred for additional 16 hours at room temperature. After changing the solvent to toluene, filtration from LiCl and storage at –25°C for three weeks pale yellow crystals of **2** are obtained. Yield: 115 mg (15%).

**2: Element. Analysis:** C<sub>16</sub>H<sub>36</sub>P<sub>4</sub>Ge<sub>8</sub>Br<sub>6</sub> (1412.8 g/mol): C 13.33 (calc. 13.60); H 2.59 (2.57)%. **MS** (EI, 70 eV): *m/z* (%) = 1412.8 (1) [M<sup>+</sup>]; **<sup>31</sup>P MAS NMR** (121.50 MHz, 25°C, 30 kHz, NaH<sub>2</sub>PO<sub>4</sub>): δ = –92 ppm (s, 2 P2), 58 (s, 2 P1).

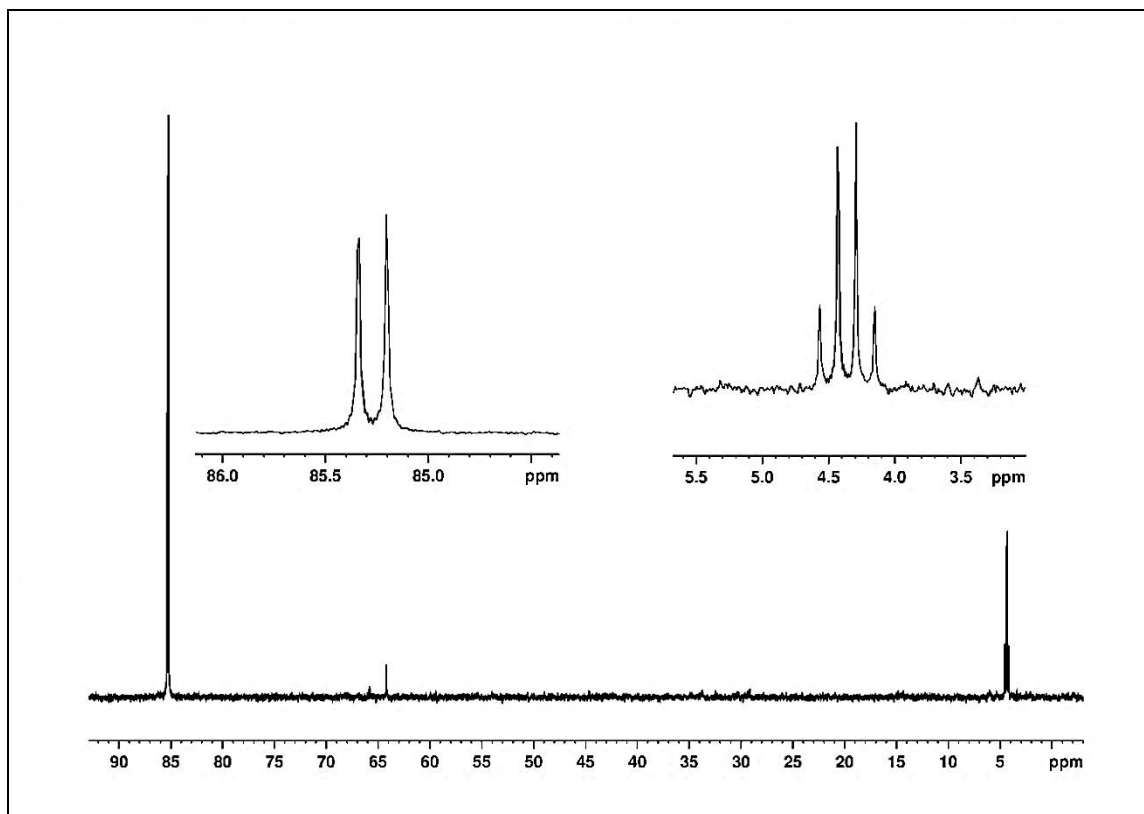

**Figure S1:**  $^{31}\text{P}\{^1\text{H}\}$  NMR spectrum ( $\text{C}_6\text{D}_6$ , 300 K) of the reaction solution of **1**.

## 2. Crystallographic Details

The crystal structure analyses were performed on an OXFORD Diffraction Gemini R Ultra CCD diffractometer with  $\text{Cu}_{\text{K}\alpha}$  radiation ( $\lambda = 1.54184 \text{ \AA}$ ). The structures were solved by direct methods with the program SHELXS-97,<sup>[3a]</sup> and full matrix least square refinement on  $F^2$  in SHELXL-97<sup>[3b]</sup> was performed with anisotropic displacements for non H-atoms.

Hydrogen atoms were located in idealized positions and refined isotropically according to the riding model. **1**:  $\text{C}_{22}\text{H}_{50}\text{P}_4\text{Ge}_7\text{Cl}_6$ ,  $M_r = 939.73$ , crystal size:  $0.31 \times 0.05 \times 0.04 \text{ mm}^3$ , trigonal, space group  $P\bar{3}$ ,  $a = 14.2614(4)$ ,  $b = 14.2614(4)$ ,  $c = 11.0241(2) \text{ \AA}$ ,  $\alpha = 90^\circ$ ,  $\beta = 90^\circ$ ,  $\gamma = 120^\circ$ ,  $V = 1941.77(8) \text{ \AA}^3$ ,  $T = 123(1) \text{ K}$ ,  $Z = 2$ ,  $\rho_{\text{calc.}} = 1.983 \text{ g cm}^{-3}$ ,  $\mu = 11.567 \text{ mm}^{-1}$ , 3245 measured reflections, 1745 independent reflections ( $R_{\text{int}} = 0.0209$ ),  $R_1 = 0.0343$ ,  $wR_2 = 0.0758$ . **2**:  $\text{C}_{16}\text{H}_{36}\text{P}_4\text{Br}_6\text{Ge}_8$ ,  $M_r = 1412.61$ , crystal size:  $0.25 \times 0.04 \times 0.02 \text{ mm}^3$ , orthorhombic, space group  $Pbcn$ ,  $a = 16.9638(2)$ ,  $b = 13.8428(1)$ ,  $c = 16.3948(2) \text{ \AA}$ ,  $V = 3849.93(7) \text{ \AA}^3$ ,  $T = 123(1) \text{ K}$ ,  $Z = 4$ ,  $\rho_{\text{calc.}} = 1.130 \text{ g cm}^{-3}$ ,  $\mu = 2.437 \text{ mm}^{-1}$ , 10878 measured reflections, 3000 independent reflections ( $R_{\text{int}} = 0.0453$ ),  $R_1 = 0.0416$ ,  $wR_2 = 0.1059$ .

### 3. Computational Details

The geometry optimisation was performed with the TURBOMOLE program package<sup>4</sup> at the (RI-) BP86<sup>6</sup>/TZVP<sup>6a,7</sup> level of theory including the Multipole Accelerated Resolution of Identity (MARI-J) approximation<sup>8</sup>. The NBO<sup>9</sup> analysis was performed on using Gaussian<sup>10</sup> with the BP86<sup>6</sup> functional and 6-31+G\*<sup>11</sup> basis set. The shared electron numbers (SEN) were calculated using TURBOMOLE and correlate with the strength of the covalent bond.<sup>12</sup> The isosurfaces of the frontier molecular orbitals in **2** are depicted in Figure S2. The cartesian coordinates of the optimized geometries of **1** and **2** are given in table S1 and S2, respectively.

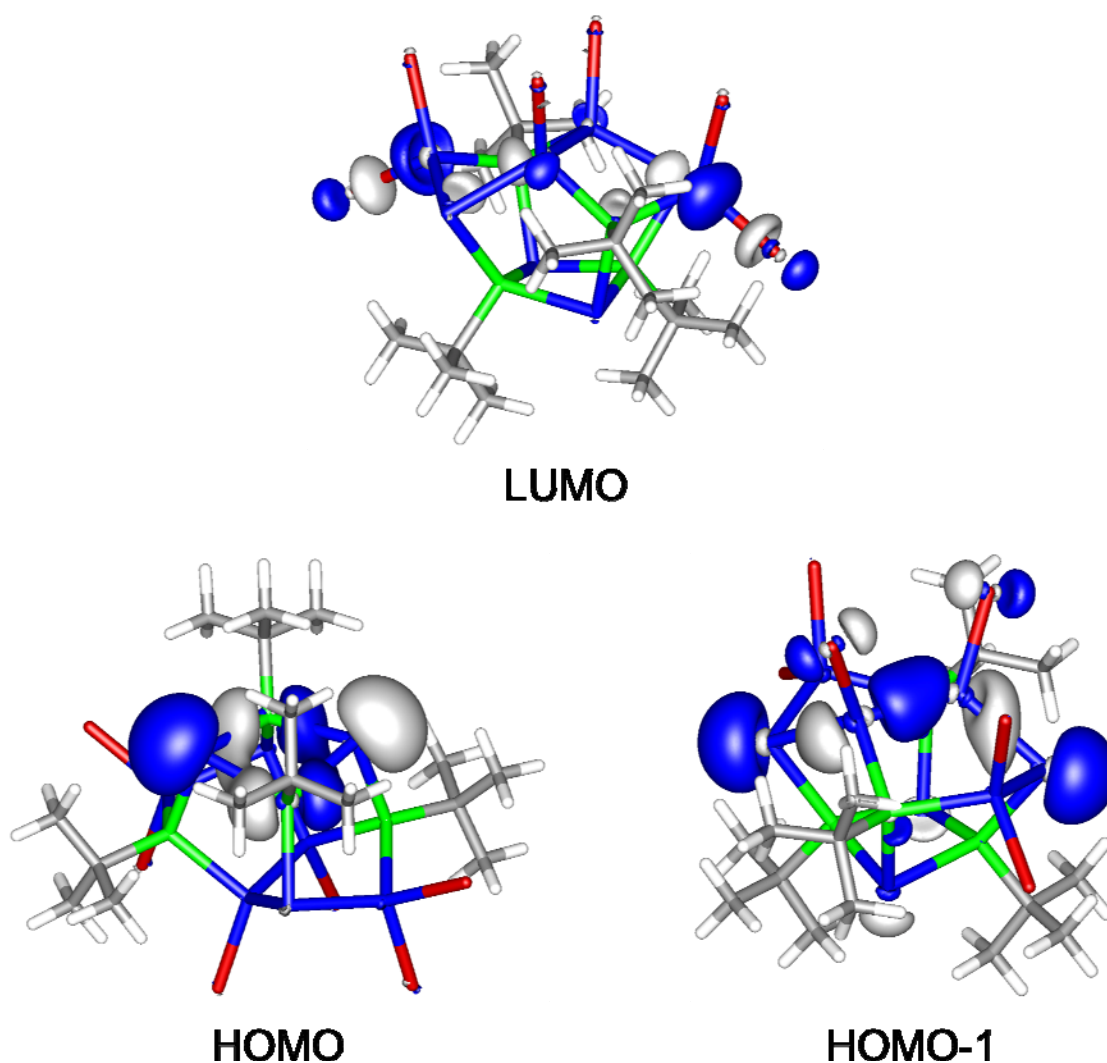

**Figure S2.** Isosurfaces of the frontier molecular orbitals in **2**.

**Table S1.** Cartesian coordinates for the optimised geometry of **1** at the BP86/TZVP level of theory.

| Atom | x          | y          | z          |
|------|------------|------------|------------|
| C    | 0.0000000  | 0.0000000  | 4.2664373  |
| C    | 1.1014136  | 0.9501298  | 4.7586787  |
| C    | -1.3735433 | 0.4787872  | 4.7586787  |
| C    | 0.2721298  | -1.4289170 | 4.7586787  |
| P    | 0.0000000  | 0.0000000  | 2.3300944  |
| H    | 1.1129214  | 0.9476224  | 5.8611467  |
| H    | 0.9289015  | 1.9870676  | 4.4329379  |
| H    | 2.0985820  | 0.6467721  | 4.4100002  |
| H    | -1.3771258 | 0.4900070  | 5.8611467  |
| H    | -2.1853017 | -0.1890815 | 4.4329379  |
| H    | -1.6094121 | 1.4940393  | 4.4100002  |
| H    | 0.2642044  | -1.4376294 | 5.8611467  |
| H    | 1.2564003  | -1.7979861 | 4.4329379  |
| H    | -0.4891700 | -2.1408114 | 4.4100002  |
| Ge   | -1.9878539 | -1.4778133 | 1.7529231  |
| Ge   | 2.2737508  | -0.9826253 | 1.7529231  |
| Ge   | -0.2858969 | 2.4604387  | 1.7529231  |
| P    | -0.8822297 | -1.9135374 | -0.4091572 |
| Ge   | -3.0332976 | 0.5818308  | 0.6985925  |
| P    | 2.0982868  | 0.1927354  | -0.4091572 |
| Ge   | 1.0127686  | -2.9178282 | 0.6985925  |
| P    | -1.2160571 | 1.7208020  | -0.4091572 |
| Ge   | 2.0205291  | 2.3359974  | 0.6985925  |
| C    | -1.8163347 | -3.1515865 | -1.5625536 |
| Ge   | 0.0000000  | 0.0000000  | -1.7651884 |
| Cl   | -4.7967397 | 0.4275332  | -0.6655700 |
| Cl   | -3.8090307 | 2.0443279  | 2.2078155  |
| C    | 3.6375214  | 0.0028013  | -1.5625536 |
| Cl   | 2.0281152  | -4.3678651 | -0.6655700 |
| Cl   | 0.1340755  | -4.3208813 | 2.2078155  |
| C    | -1.8211866 | 3.1487853  | -1.5625536 |
| Cl   | 2.7686245  | 3.9403318  | -0.6655700 |
| Cl   | 3.6749553  | 2.2765534  | 2.2078155  |
| C    | -3.1348366 | -2.5008036 | -2.0026422 |
| C    | -2.0947113 | -4.4471773 | -0.7860777 |
| C    | -0.9321109 | -3.4331224 | -2.7883148 |
| C    | 3.7331778  | -1.4644463 | -2.0026422 |
| C    | 4.8987241  | 0.4095154  | -0.7860777 |
| C    | 3.4392266  | 0.9093295  | -2.7883148 |
| C    | -0.5983412 | 3.9652500  | -2.0026422 |
| C    | -2.8040128 | 4.0376618  | -0.7860777 |
| C    | -2.5071157 | 2.5237929  | -2.7883148 |
| H    | -2.9729277 | -1.5532999 | -2.5359819 |
| H    | -3.8060186 | -2.3038671 | -1.1563376 |
| H    | -3.6564921 | -3.1858664 | -2.6916005 |
| H    | -2.6763943 | -5.1261567 | -1.4312702 |
| H    | -2.6841111 | -4.2643296 | 0.1237425  |
| H    | -1.1715547 | -4.9668407 | -0.4983144 |
| H    | 0.0259615  | -3.8913200 | -2.5104686 |
| H    | -0.7316224 | -2.5181559 | -3.3654291 |
| H    | -1.4635269 | -4.1345383 | -3.4525672 |
| H    | 2.8316610  | -1.7979810 | -2.5359819 |
| H    | 3.8982167  | -2.1441753 | -1.1563376 |
| H    | 4.5872873  | -1.5736818 | -2.6916005 |
| H    | 5.7775791  | 0.2452529  | -1.4312702 |
| H    | 5.0350733  | -0.1923436 | 0.1237425  |
| H    | 4.8871876  | 1.4688242  | -0.4983144 |

|   |            |           |            |
|---|------------|-----------|------------|
| H | 3.3570012  | 1.9681434 | -2.5104686 |
| H | 2.5465982  | 0.6254743 | -3.3654291 |
| H | 4.3123786  | 0.7998177 | -3.4525672 |
| H | 0.1412667  | 3.3512808 | -2.5359819 |
| H | -0.0921981 | 4.4480423 | -1.1563376 |
| H | -0.9307952 | 4.7595482 | -2.6916005 |
| H | -3.1011848 | 4.8809038 | -1.4312702 |
| H | -2.3509622 | 4.4566732 | 0.1237425  |
| H | -3.7156328 | 3.4980165 | -0.4983144 |
| H | -3.3829628 | 1.9231767 | -2.5104686 |
| H | -1.8149758 | 1.8926816 | -3.3654291 |
| H | -2.8488517 | 3.3347206 | -3.4525672 |

---

**Table S2.** Cartesian coordinates for the optimised geometry of **2** at the BP86/TZVP level of theory.

| Atom | x          | y          | z          |
|------|------------|------------|------------|
| Ge   | 1.5452844  | -0.9919296 | -1.0760771 |
| Ge   | -1.5452844 | 0.9919296  | -1.0760771 |
| Ge   | -1.5326862 | -2.6913855 | 1.2540883  |
| Ge   | 1.5326862  | 2.6913855  | 1.2540883  |
| Ge   | -0.1561525 | 1.2704091  | 2.5328646  |
| Ge   | 3.1932649  | 0.8552790  | 1.8333667  |
| Ge   | 0.1561525  | -1.2704091 | 2.5328646  |
| Ge   | -3.1932649 | -0.8552790 | 1.8333667  |
| P    | 0.8868889  | 1.3854819  | -0.7168336 |
| P    | 2.1986820  | -1.2954238 | 1.2604518  |
| P    | -2.1986820 | 1.2954238  | 1.2604518  |
| P    | -0.8868889 | -1.3854819 | -0.7168336 |
| Br   | 0.5640391  | -2.0658658 | 4.7338589  |
| Br   | -3.8461788 | -0.8125372 | 4.1174945  |
| Br   | -5.2601798 | -0.9076517 | 0.6216584  |
| Br   | 3.8461788  | 0.8125372  | 4.1174945  |
| Br   | 5.2601798  | 0.9076517  | 0.6216584  |
| Br   | -0.5640391 | 2.0658658  | 4.7338589  |
| C    | -1.4724682 | -2.4217283 | -2.2398449 |
| C    | -1.0972287 | -1.6786691 | -3.5301874 |
| C    | -2.9943401 | -2.6028908 | -2.1588273 |
| C    | -0.7612398 | -3.7830310 | -2.1921725 |
| C    | 1.4724682  | 2.4217283  | -2.2398449 |
| C    | 3.2843399  | -2.8774453 | 1.4959986  |
| C    | -3.2843399 | 2.8774453  | 1.4959986  |
| C    | 1.0972287  | 1.6786691  | -3.5301874 |
| C    | 2.9943401  | 2.6028908  | -2.1588273 |
| C    | 0.7612398  | 3.7830310  | -2.1921725 |
| C    | 4.3173136  | -2.9240654 | 0.3590755  |
| C    | 2.3481441  | -4.0945960 | 1.4227114  |
| C    | 3.9860464  | -2.8146789 | 2.8601754  |
| C    | -4.3173136 | 2.9240654  | 0.3590755  |
| C    | -2.3481441 | 4.0945960  | 1.4227114  |
| C    | -3.9860464 | 2.8146789  | 2.8601754  |
| H    | -1.4217698 | -2.2719938 | -4.4008928 |
| H    | -0.0104804 | -1.5299125 | -3.6172492 |
| H    | -1.5912550 | -0.6977769 | -3.5942284 |
| H    | -3.3432178 | -3.1769230 | -3.0334047 |
| H    | -3.5231095 | -1.6390817 | -2.1564538 |

|   |            |            |            |
|---|------------|------------|------------|
| H | -3.2951520 | -3.1545364 | -1.2563985 |
| H | -1.0145188 | -4.3446967 | -1.2808745 |
| H | 0.3330556  | -3.6729120 | -2.2409976 |
| H | -1.0734621 | -4.3909684 | -3.0573168 |
| H | 1.4217698  | 2.2719938  | -4.4008928 |
| H | 0.0104804  | 1.5299125  | -3.6172492 |
| H | 1.5912550  | 0.6977769  | -3.5942284 |
| H | 3.3432178  | 3.1769230  | -3.0334047 |
| H | 3.5231095  | 1.6390817  | -2.1564538 |
| H | 3.2951520  | 3.1545364  | -1.2563985 |
| H | 1.0145188  | 4.3446967  | -1.2808745 |
| H | -0.3330556 | 3.6729120  | -2.2409976 |
| H | 1.0734621  | 4.3909684  | -3.0573168 |
| H | 4.9465419  | -3.8189391 | 0.4960266  |
| H | 4.9739104  | -2.0437847 | 0.3645270  |
| H | 3.8404748  | -2.9947158 | -0.6292217 |
| H | 1.8041544  | -4.1406991 | 0.4677997  |
| H | 1.6186753  | -4.1031332 | 2.2448507  |
| H | 2.9545980  | -5.0117126 | 1.5052044  |
| H | 4.5587474  | -3.7463124 | 3.0009423  |
| H | 3.2714709  | -2.7266814 | 3.6890951  |
| H | 4.6905299  | -1.9747954 | 2.9207909  |
| H | -4.9465419 | 3.8189391  | 0.4960266  |
| H | -4.9739104 | 2.0437847  | 0.3645270  |
| H | -3.8404748 | 2.9947158  | -0.6292217 |
| H | -1.8041544 | 4.1406991  | 0.4677997  |
| H | -1.6186753 | 4.1031332  | 2.2448507  |
| H | -2.9545980 | 5.0117126  | 1.5052044  |
| H | -4.5587474 | 3.7463124  | 3.0009423  |
| H | -3.2714709 | 2.7266814  | 3.6890951  |
| H | -4.6905299 | 1.9747954  | 2.9207909  |

---

## References:

- <sup>1</sup> T. Fjeldberg, A. Haaland, E. R. Schilling, M. F. Lappert, A. J. Thorne, *Dalton Trans.* **1986**, 1551.
- <sup>2</sup> W. A. Herrmann, G. Brauer, *Synthetic Methods of Organometallic and Inorganic Chemistry*, Vol. 3, Thieme Verlag, Stuttgart, 1996.
- <sup>3</sup> a) G. M. Sheldrick, SHELXS-97, University of Göttingen, **1997**; b) G. M. Sheldrick, SHELXL-97, University of Göttingen, **1997**.
- <sup>4</sup> a) O. Treutler, R. Ahlrichs, *J. Chem. Phys.* 1995, **102**, 346–354; b) R. Ahlrichs, M. Bär, M. Häser, H. Horn, C. Kölmel, *Chem. Phys. Lett.* 1989, **162**, 165–169.
- <sup>5</sup> a) K. Eichkorn, F. Weigend, O. Treutler, R. Ahlrichs, *Theor. Chem. Acc.* 1997, **97**, 119–124; b) K. Eichkorn, O. Treutler, H. Oehm, M. Häser, R. Ahlrichs, *Chem. Phys. Lett.* 1995, **242**, 652–660.
- <sup>6</sup> a) A. D. Becke, *Phys. Rev. A* 1988, **38**, 3098–3100; b) J. P. Perdew, *Phys. Rev. B* 1986, **33**, 8822–8824; erratum: J. P. Perdew, *Phys. Rev. B* 1986, **34**, 7406.

- 
- <sup>7</sup> a) F. Weigend, R. Ahlrichs, *Phys. Chem. Chem. Phys.* 2005, **7**, 3297–3305; b) A. Schäfer, C. Huber, R. Ahlrichs, *J. Chem. Phys.* 1994, **100**, 5829–5835.
- <sup>8</sup> M. Sierka, A. Hogekamp, R. Ahlrichs, *J. Chem. Phys.* 2003, **118**, 9136–9148.
- <sup>9</sup> NBO Version 3.1, E. D. Glendening, A. E. Reed, J. E. Carpenter, F. Weinhold.
- <sup>10</sup> Gaussian 03, Revision D.01, M. J. Frisch, G. W. Trucks, H. B. Schlegel, G. E. Scuseria, M. A. Robb, J. R. Cheeseman, J. A. Montgomery, Jr., T. Vreven, K. N. Kudin, J. C. Burant, J. M. Millam, S. S. Iyengar, J. Tomasi, V. Barone, B. Mennucci, M. Cossi, G. Scalmani, N. Rega, G. A. Petersson, H. Nakatsuji, M. Hada, M. Ehara, K. Toyota, R. Fukuda, J. Hasegawa, M. Ishida, T. Nakajima, Y. Honda, O. Kitao, H. Nakai, M. Klene, X. Li, J. E. Knox, H. P. Hratchian, J. B. Cross, V. Bakken, C. Adamo, J. Jaramillo, R. Gomperts, R. E. Stratmann, O. Yazyev, A. J. Austin, R. Cammi, C. Pomelli, J. W. Ochterski, P. Y. Ayala, K. Morokuma, G. A. Voth, P. Salvador, J. J. Dannenberg, V. G. Zakrzewski, S. Dapprich, A. D. Daniels, M. C. Strain, O. Farkas, D. K. Malick, A. D. Rabuck, K. Raghavachari, J. B. Foresman, J. V. Ortiz, Q. Cui, A. G. Baboul, S. Clifford, J. Cioslowski, B. B. Stefanov, G. Liu, A. Liashenko, P. Piskorz, I. Komaromi, R. L. Martin, D. J. Fox, T. Keith, M. A. Al-Laham, C. Y. Peng, A. Nanayakkara, M. Challacombe, P. M. W. Gill, B. Johnson, W. Chen, M. W. Wong, C. Gonzalez, and J. A. Pople, Gaussian, Inc., Wallingford CT, 2004.
- <sup>11</sup> a) R. Ditchfield, W. J. Hehre, J. A. Pople, *J. Chem. Phys.*, 1971, **54**, 724; b) P. C. Hariharan and J. A. Pople, *Theor. Chem. Acc.*, 1973, **28**, 213; c) M. M. Francl, W. J. Pietro, W. J. Hehre, J. S. Binkley, D. J. DeFrees, J. A. Pople, M. S. Gordon, *J. Chem. Phys.*, 1982, **77**, 3654; d) V. A. Rassolov, M. A. Ratner, J. A. Pople, P. C. Redfern, L. A. Curtiss, *J. Comp. Chem.*, 2001, **22**, 976.
- <sup>12</sup> C. Ehrhardt; R. Ahlrichs, *Theor. Chim. Acta*, 1985, **68**, 231.
